# Supplementary material for: Iconicity and systematicity in phonaesthemes: A cross-linguistic study
Source: publisher site journal article supplement (doi:10.1515/cog-2018-0079), 2020-04-01
Supplement: Supplementary file 1 [file cog-2018-0079ad.zip]

## Appendix I. Non-words by word-initial phonaestheme (/fl-, tr-/) or distractor (/m, n/)

| French   |         |        |        | English   |            |           |          |
|----------|---------|--------|--------|-----------|------------|-----------|----------|
| fl       | tr      | m/n    |        | fl        | tr         | m/n       |          |
| flapet   | trapet  | mapet  | nipas  | flassa    | trabba     | mutchā    | notchā   |
| /flapɛ/  | /tɹapɛ/ | /mapɛ/ | /nipa/ | /ˈflæsə/  | /ˈtræbə/   | /ˈmʌtʃə/  | /ˈnɒtʃə/ |
| fléba    | trêpot  | madis  | nopet  | flogga    | trooha     | mudga     | nidda    |
| /fleba/  | /tɹɛpɔ/ | /madi/ | /noɛ/  | /ˈflɒgə/  | /ˈtru:hə/  | /ˈmʌdʒə/  | /ˈnɪdə/  |
| flépis   | tripet  | mépet  | noupot | flissa    | trotha     | meedga    | nunna    |
| /flepi/  | /tɹɪpɛ/ | /mɛpɛ/ | /nupo/ | /ˈflɪsə/  | /ˈtrɒθə/   | /ˈmi:dʒə/ | /ˈnʌnə/  |
| flébet   | trabu   | mibet  | nébot  | flobba    | tridda     | muzza     | nibba    |
| /fleβɛ/  | /tɹaby/ | /mibɛ/ | /nebo/ | /ˈflɒbə/  | /ˈtrɪdə/   | /ˈmʌzə/   | /ˈnɪbə/  |
| flipot   | tribet  | mapot  | nipet  | fliya     | tramma     | mootchā   | nuha     |
| /fliɔ/   | /tɹɪbɛ/ | /mapɔ/ | /nɪpɛ/ | /ˈflijə/  | /ˈtræmə/   | /ˈmu:tʃə/ | /ˈnʌhə/  |
| flobet   | tratet  | mipot  | nibou  | floya     | trippa     | mooma     | nappa    |
| /flɔβɛ/  | /tɹatɛ/ | /mɪpɔ/ | /nibu/ | /ˈflɔjə/  | /ˈtrɪpə/   | /ˈmu:mə/  | /ˈnæpə/  |
| flaupū   | tridet  | mopet  | noubet | flibba    | tribba     | mawva     | nudda    |
| /flopy/  | /tɹɪdɛ/ | /mɔpɛ/ | /nubɛ/ | /ˈflɪbə/  | /ˈtrɪbə/   | /ˈmɔ:və/  | /ˈnʌdə/  |
| floubet  | traitu  | mapis  | nabet  | flotha    | trogga     | mimma     | nedga    |
| /fluβɛ/  | /tɹɛty/ | /mapi/ | /nabɛ/ | /ˈflɒθə/  | /ˈtrɒgə/   | /ˈmɪmə/   | /ˈnɛdʒə/ |
| flodet   | trappis | mébet  | népet  | flabba    | travva     | mucca     | neeya    |
| /flɔdɛ/  | /tɹapi/ | /mɛβɛ/ | /nɛpɛ/ | /ˈflæbə/  | /ˈtrævə/   | /ˈmʌkə/   | /ˈni:jə/ |
| flidet   | tritot  | midet  | nadis  | fladda    | trootchā   | mosha     | nuvva    |
| /flɪdɛ/  | /tɹɪtɔ/ | /mɪdɛ/ | /nadi/ | /ˈflædə/  | /ˈtru:tʃə/ | /ˈmɒʃə/   | /ˈnʌvə/  |
| flicot   | tradet  | mébot  | népis  | fiazza    | troodga    | meeca     | nusha    |
| /fliɔ/   | /tɹadɛ/ | /mɛbɔ/ | /nɛpi/ | /ˈflæzə/  | /ˈtru:dʒə/ | /ˈmi:kə/  | /ˈnʌʃə/  |
| flouquet | triquet | macot  | nébet  | flagga    | trutha     | mawma     | nesha    |
| /fluɛ/   | /tɹɪkɛ/ | /makɔ/ | /nɛβɛ/ | /ˈflægə/  | /ˈtrʌθə/   | /ˈmɔ:mə/  | /ˈnɛʃə/  |
| fladis   | troubis | mobet  | nadot  | flocca    | treena     | midda     | nutha    |
| /fladi/  | /tɹubi/ | /mɔβɛ/ | /nado/ | /ˈflɒkə/  | /ˈtri:nə/  | /ˈmɪdə/   | /ˈnʌθə/  |
| flédot   | traubet | méquīs | nédet  | fleeya    | trodga     | miyya     | nezza    |
| /fledɔ/  | /tɹɔβɛ/ | /meki/ | /nɛdɛ/ | /ˈfli:jə/ | /ˈtrɒdʒə/  | /ˈmɪjə/   | /ˈnezə/  |
| flacot   | trotis  | midot  | nacot  | flidda    | treetchā   | mabba     | nidga    |
| /flako/  | /tɹɔti/ | /mɪdɔ/ | /nako/ | /ˈflɪdə/  | /ˈtri:tʃə/ | /ˈmæbə/   | /ˈnɪdʒə/ |
| flasot   | tridot  | moupot | nougot | flebba    | tricca     | mawba     | neha     |
| /flazo/  | /tɹɪdɔ/ | /mupo/ | /nugo/ | /ˈflɛbə/  | /ˈtrɪkə/   | /ˈmɔ:bə/  | /ˈnehə/  |
| flachu   | trodet  | migot  | nodet  | fluzza    | tromma     | mumma     | netchā   |
| /flafy/  | /tɹɔdɛ/ | /migo/ | /nɔdɛ/ | /ˈflʌzə/  | /ˈtrɒmə/   | /ˈmʌmə/   | /ˈnɛtʃə/ |
| flauchot | triquet | moubet | nicot  | fleedga   | trobba     | mawcā     | nippa    |

|         |          |         |         |           |           |           |           |
|---------|----------|---------|---------|-----------|-----------|-----------|-----------|
| /floʃo/ | /tʁike/  | /mubɛ/  | /niko/  | /'fli:ʤə/ | /'trɔbə/  | /'mɔ:kə/  | /'nɪpə/   |
| fléjot  | traquis  | maguet  | nouquet | flaya     | traya     | muwa      | nawba     |
| /fleʒo/ | /tʁaki/  | /mage/  | /nuke/  | /'flæjə/  | /'træjə/  | /'mɔ:wə/  | /'nɔ:bə/  |
| flayot  | troquis  | mémot   | niguet  | floppa    | tranna    | mibba     | needa     |
| /flajo/ | /tʁoki/  | /memo/  | /nige/  | /'flɔpə/  | /'trænə/  | /'mɪbə/   | /'ni:də/  |
| fléchu  | trouquet | manis   | néguis  | flappa    | tronna    | moosha    | nawma     |
| /fleʃy/ | /tʁuke/  | /mani/  | /negi/  | /'flæpə/  | /'trɔnə/  | /'mu:ʃə/  | /'nɔ:mə/  |
| flajet  | trigot   | minet   | namis   | flimma    | trodda    | meeba     | nooma     |
| /flaʒɛ/ | /tʁigo/  | /minɛ/  | /nami/  | /'flɪmə/  | /'trɔdə/  | /'mi:bə/  | /'nu:mə/  |
| flassot | tréguet  | méguet  | nomis   | flitha    | troova    | mesha     | nosha     |
| /flaso/ | /tʁeʒɛ/  | /meʒɛ/  | /nomi/  | /'flɪθə/  | /'tru:və/ | /'mɛʃə/   | /'nɒʃə/   |
| flanis  | trougot  | mavot   | nanet   | flitcha   | trovva    | mezza     | needga    |
| /flani/ | /tʁugo/  | /mavo/  | /nanɛ/  | /'flɪtʃə/ | /'trɔvə/  | /'mezə/   | /'ni:ʤə/  |
| flafet  | trimot   | moucot  | ninut   | flossa    | trosha    | massa     | nazza     |
| /flafɛ/ | /tʁimo/  | /muko/  | /niny/  | /'flɔsə/  | /'trɔʃə/  | /'mæsə/   | /'næzə/   |
| fléquis | tromet   | mivot   | nonet   | flessa    | troppa    | movva     | nayya     |
| /fleki/ | /tʁome/  | /mivo/  | /nɔnɛ/  | /'flesə/  | /'trɔpə/  | /'mɔvə/   | /'næjə/   |
| flaguet | trouna   | momet   | névot   | flucca    | tradda    | meesha    | nessa     |
| /flaʒɛ/ | /tʁuna/  | /mɔmɛ/  | /nevo/  | /'flɒkə/  | /'trædə/  | /'mi:ʃə/  | /'nesə/   |
| flogot  | tronis   | mouguet | nivet   | flodda    | trocca    | musha     | nawsha    |
| /flogo/ | /tʁoni/  | /mugɛ/  | /nive/  | /'flɔdə/  | /'trɔkə/  | /'mɒʃə/   | /'nɔ:ʃə/  |
| fléguet | trinet   | monot   | novet   | flamma    | trimma    | midga     | nutchta   |
| /fleʒɛ/ | /tʁinɛ/  | /mɔnɔ/  | /nɔvɛ/  | /'flæmə/  | /'trɪmə/  | /'mɪdʒə/  | /'nɒtʃə/  |
| flamot  | trévet   | mochu   | nessat  | flisha    | tragga    | misha     | nebba     |
| /flamo/ | /tʁɛvɛ/  | /mɔʃy/  | /nesa/  | /'flɪʃə/  | /'trægə/  | /'mɪʃə/   | /'nebə/   |
| flauvu  | trassaut | mouchis | naset   | fleya     | tredga    | madga     | nuwa      |
| /flovy/ | /tʁaso/  | /muʃi/  | /nazɛ/  | /'flejə/  | /'trɛdʒə/ | /'mædʒə/  | /'nɒwə/   |
| flesset | traset   | mipet   | nidet   | flutcha   | traha     | moowa     | nabba     |
| /flese/ | /tʁazɛ/  | /mipe/  | /nide/  | /'flɒtʃə/ | /'træhə/  | /'mu:wə/  | /'næbə/   |
| flissot | trachot  | mabit   | noudot  | flozza    | trawva    | mooda     | nodda     |
| /fliso/ | /tʁako/  | /mabi/  | /nudo/  | /'flɔzə/  | /'trɔ:və/ | /'mu:də/  | /'nɔdə/   |
| floset  | trallet  | mibut   | noguet  | flavva    | tradga    | masha     | nawtcha   |
| /flozɛ/ | /tʁalɛ/  | /miby/  | /nɔʒɛ/  | /'flævə/  | /'trædʒə/ | /'mæʃə/   | /'nɔ:tʃə/ |
| flissu  | trajou   | médet   | nounot  | flewa     | treesha   | mavva     | naha      |
| /flisy/ | /tʁazu/  | /medɛ/  | /nuno/  | /'flewə/  | /'tri:ʃə/ | /'mævə/   | /'næhə/   |
| flousot | trarot   | mégu    | nisset  | flodga    | trawsha   | mozza     | noossa    |
| /fluzo/ | /tʁavɔ/  | /megy/  | /nise/  | /'flɔdʒə/ | /'trɔ:ʃə/ | /'mɔzə/   | /'nu:sə/  |
| flésot  | trépet   | mamot   | nissot  | flosha    | triha     | meetcha   | noha      |
| /flezo/ | /tʁɛpɛ/  | /mamo/  | /niso/  | /'flɔʃə/  | /'tri:hə/ | /'mi:tʃə/ | /'nɒhə/   |
| flassis | trécot   | ménet   | napot   | flotcha   | trissa    | medga     | noowa     |

|          |         |        |         |            |           |          |          |
|----------|---------|--------|---------|------------|-----------|----------|----------|
| /flasi/  | /tʁeko/ | /menɛ/ | /napo/  | /'flɔtʃə/  | /'trɪsə/  | /'medʒə/ | /'nu:wə/ |
| flasot   | trocot  | mévaut | nanut   | flawtcha   | trisha    | meezza   | nawza    |
| /flazo/  | /tʁoko/ | /mevo/ | /nany/  | /'flɔ:tʃə/ | /'trɪʃə/  | /'mi:zə/ | /'nɔ:zə/ |
| flachu   | triguet | mivet  | nipot   | floha      | tritcha   | mawza    | nooda    |
| /flafy/  | /tʁige/ | /mivɛ/ | /nipo/  | /'flɒhə/   | /'trɪtʃə/ | /'mɔ:zə/ | /'nu:də/ |
| flauchot | trémot  | massot | ninot   | flawsha    | tratcha   | miwa     | neesa    |
| /flofo/  | /tʁemo/ | /maso/ | /nino/  | /'flɔ:fə/  | /'trætʃə/ | /'mɪwə/  | /'ni:sə/ |
| fléjot   | trissot | méchu  | nausot  | flizza     | trivva    | mowa     | nussa    |
| /fleʒo/  | /tʁiso/ | /mɛʃy/ | /nozo/  | /'flɪzə/   | /'trɪvə/  | /'mɒwə/  | /'nʌsə/  |
| flayot   | troset  | majet  | noumet  | fliwa      | tritha    | mawda    | nobba    |
| /flajo/  | /tʁoze/ | /maʒɛ/ | /numɛ/  | /'fliwə/   | /'trɪθə/  | /'mɔ:də/ | /'nɒbə/  |
| fléchu   | traju   | méjot  | nobet   | flootcha   | trizza    | mazza    | nitcha   |
| /fleʃy/  | /tʁaʒy/ | /meʒo/ | /nɒbɛ/  | /'flu:tʃə/ | /'trɪzə/  | /'mæzə/  | /'nɪtʃə/ |
| flajet   | tressot | médeau | nochet  | flawa      | tressa    | medda    | nodga    |
| /flaʒɛ/  | /tʁɛso/ | /medo/ | /nɔʃɛ/  | /'flɔ:wə/  | /'tresə/  | /'medə/  | /'nɒdʒə/ |
| flijou   | trida   | mijet  | noquet  | flivva     | treeda    | meeha    | niwa     |
| /fliʒu/  | /tʁida/ | /mɪʒɛ/ | /nɔkɛ/  | /'flɪvə/   | /'tri:də/ | /'mi:hə/ | /'nɪwə/  |
| flédet   | traugat | mébat  | német   | fleda      | trawga    | mebba    | nemma    |
| /fledɛ/  | /tʁoga/ | /meba/ | /nemɛ/  | /'fleda/   | /'trɔ:gə/ | /'mebə/  | /'nemə/  |
| flumet   | tripot  | madat  | naca    | flooma     | treepa    | mudda    | nacca    |
| /flymɛ/  | /tʁipo/ | /mada/ | /naka/  | /'flu:mə/  | /'tri:pə/ | /'mʌdə/  | /'nækə/  |
| flugot   | tremot  | mépat  | niva    | flooga     | tremma    | meppa    | nivva    |
| /flygo/  | /tʁəmo/ | /mepa/ | /niva/  | /'flu:gə/  | /'tremə/  | /'mepə/  | /'nɪvə/  |
| flaya    | trillu  | muda   | naupa   | fluya      | treeya    | mooha    | noppa    |
| /fleja/  | /tʁily/ | /myda/ | /nopa/  | /'flʌjə/   | /'tri:jə/ | /'mu:hə/ | /'nɒpə/  |
| fléda    | treilla | maussa | nésat   | fludda     | treya     | mossa    | netha    |
| /fleda/  | /tʁɛja/ | /mosa/ | /neza/  | /'flʌdə/   | /'trejə/  | /'mɒsə/  | /'neθə/  |
| flumot   | trounat | méquet | nausa   | flawma     | troona    | macca    | nossa    |
| /flymo/  | /tʁuna/ | /mekɛ/ | /noza/  | /'flɔ:mə/  | /'tru:nə/ | /'mækə/  | /'nɒsə/  |
| fligot   | troyo   | moupas | nillot  | fleega     | trawya    | moopa    | niya     |
| /fligo/  | /tʁajo/ | /mupa/ | /nijo/  | /'fli:gə/  | /'træjə/  | /'mu:pə/ | /'nɪjə/  |
| flimaut  | triyo   | moset  | nasseau | fleema     | truya     | mawssa   | natha    |
| /flimo/  | /tʁijo/ | /moʒɛ/ | /naso/  | /'fli:mə/  | /'trʌjə/  | /'mɔ:sə/ | /'næθə/  |
| flapet   | trévot  | moguet | naquot  | fluppa     | treeva    | mogga    | nucca    |
| /flapɛ/  | /tʁɛvo/ | /mɔʒɛ/ | /nako/  | /'flʌpə/   | /'tri:və/ | /'mɒgə/  | /'nʌkə/  |
| flessat  | tricet  | muteau | naupet  | fletha     | treetha   | moona    | nawtha   |
| /flesa/  | /tʁɪsɛ/ | /myto/ | /noʔɛ/  | /'fleθə/   | /'tri:θə/ | /'mu:nə/ | /'nɔ:θə/ |
| flossat  | truba   | misset | nameau  | flawssa    | trooba    | meetha   | namma    |
| /flɔsa/  | /tʁyba/ | /misɛ/ | /namo/  | /'flɔ:sə/  | /'tru:bə/ | /'mi:θə/ | /'næmə/  |
| flisset  | trayo   | miguét | niguét  | fleetha    | trooya    | migga    | neega    |

|          |           |         |         |           |           |          |          |
|----------|-----------|---------|---------|-----------|-----------|----------|----------|
| /flise/  | /tʁɛjo/   | /mige/  | /nige/  | /'fli:θə/ | /'tru:ʒə/ | /'mɪgə/  | /'ni:gə/ |
| flosset  | tribet    | mépot   | nasset  | flawza    | treeba    | muppa    | nassa    |
| /flɔse/  | /tʁɪbɛ/   | /mepo/  | /nasɛ/  | /'flɔ:zə/ | /'tri:bə/ | /'mʌpə/  | /'næsə/  |
| flobet   | trouillet | moset   | nusset  | flawba    | trooca    | mawtha   | nootha   |
| /flɔbɛ/  | /tʁɯje/   | /moze/  | /nyse/  | /'flɔ:bə/ | /'tru:kə/ | /'mɔ:θə/ | /'nu:θə/ |
| flabet   | tréret    | médot   | naquet  | flubba    | treessa   | mooga    | necca    |
| /flabɛ/  | /tʁɛvɛ/   | /medo/  | /nakɛ/  | /'flʌbə/  | /'tri:sə/ | /'mu:gə/ | /'nekə/  |
| flayot   | trivot    | muteau  | nera    | flooya    | trootha   | mugga    | nevva    |
| /flejo/  | /tʁɪʒo/   | /myto/  | /nəʁa/  | /'flu:ʒə/ | /'tru:θə/ | /'mʌgə/  | /'nevə/  |
| flimeau  | triret    | misset  | navot   | flemma    | trawssa   | mitha    | nuya     |
| /flimo/  | /tʁɪvɛ/   | /mise/  | /navo/  | /'flemə/  | /'trɔ:sə/ | /'mɪθə/  | /'nʌjə/  |
| flobau   | tragot    | maté    | nubo    | flooba    | truca     | muya     | nooba    |
| /flobo/  | /tʁago/   | /mate/  | /nybo/  | /'flu:bə/ | /'trʌkə/  | /'mʌjə/  | /'nu:bə/ |
| fléyet   | tramet    | mévet   | nonet   | flooda    | trussa    | muha     | nawna    |
| /flejɛ/  | /tʁame/   | /mevɛ/  | /nɔnɛ/  | /'flu:də/ | /'trʌsə/  | /'mʌhə/  | /'nɔ:nə/ |
| fluset   | tranot    | masset  | némat   | floossa   | treba     | mooya    | neema    |
| /flyze/  | /tʁano/   | /masɛ/  | /nema/  | /'flu:sə/ | /'trebə/  | /'mu:ʒə/ | /'ni:mə/ |
| flomat   | tramu     | messaut | nopis   | flumma    | truda     | mawha    | neepa    |
| /floma/  | /tʁamy/   | /meso/  | /nopi/  | /'flʌmə/  | /'trʌdə/  | /'mɔ:hə/ | /'ni:pə/ |
| flédot   | trouchet  | moupot  | nugot   | fleeda    | treema    | matha    | nooga    |
| /fledo/  | /tʁuʃɛ/   | /mupo/  | /nygo/  | /'fli:də/ | /'tri:mə/ | /'mæθə/  | /'nu:gə/ |
| flaneau  | trojet    | migot   | nosseau | flunna    | treca     | mawna    | nawssa   |
| /flano/  | /tʁɔʒɛ/   | /migo/  | /nɔso/  | /'flʌnə/  | /'trekə/  | /'mɔ:nə/ | /'nɔ:sə/ |
| flélut   | trouchot  | moubet  | nuga    | flawna    | treda     | menna    | nugga    |
| /flely/  | /tʁuʃo/   | /mubɛ/  | /nyga/  | /'flɔ:nə/ | /'tredə/  | /'menə/  | /'nʌgə/  |
| flisot   | tréyot    | maguet  | nichu   | fleessa   | trezza    | meessa   | nagga    |
| /flizo/  | /tʁɛjo/   | /mage/  | /nɪʃy/  | /'fli:sə/ | /'trezə/  | /'mi:sə/ | /'nægə/  |
| flalet   | troujet   | mémot   | nouchot | flawga    | treha     | meega    | nooya    |
| /flalɛ/  | /tʁuʒɛ/   | /memo/  | /nuʃo/  | /'flɔ:gə/ | /'trehə/  | /'mi:gə/ | /'nu:ʒə/ |
| flono    | tréillu   | manis   | nojet   | floona    | trunna    | meeya    | nomma    |
| /flono/  | /tʁɛjy/   | /mani/  | /nɔʒɛ/  | /'flu:nə/ | /'trʌnə/  | /'mi:ʒə/ | /'nɔmə/  |
| flésot   | troujis   | minet   | nouyot  | flootha   | trooda    | mawpa    | nissa    |
| /flezo/  | /tʁuʒɪ/   | /minɛ/  | /nujo/  | /'flu:θə/ | /'tru:də/ | /'mɔ:pə/ | /'nisə/  |
| flavvu   | trivot    | mochu   | nouja   | flooca    | truvva    | modda    | nooca    |
| /flovvy/ | /tʁivo/   | /mɔʃy/  | /nuʒa/  | /'flu:kə/ | /'trʌvə/  | /'mɔdə/  | /'nu:kə/ |
| flesset  | trouvot   | mouchis | néjot   | flawya    | trawtha   | messa    | nawca    |
| /flese/  | /tʁuvo/   | /muʃi/  | /neʒo/  | /'flɔ:ʒə/ | /'trɔ:θə/ | /'mesə/  | /'nɔ:kə/ |
| flasot   | trivet    | mipet   | nougot  | floova    | trewa     | mappa    | negga    |
| /flazo/  | /tʁive/   | /mipe/  | /nugo/  | /'flu:və/ | /'trewə/  | /'mæpə/  | /'negə/  |
| flachu   | tressot   | mabit   | nodet   | floopa    | treppa    | minna    | neeca    |

|            |          |         |         |           |           |          |          |
|------------|----------|---------|---------|-----------|-----------|----------|----------|
| /flafj/    | /tʁɛso/  | /mabi/  | /nɔdɛ/  | /'flu:pə/ | /'trepə/  | /'minə/  | /'ni:kə/ |
| flauchot   | trousset | mibut   | nicot   | floowa    | treewa    | mooca    | neetha   |
| /flofo/    | /tʁʊsɛ/  | /miby/  | /niko/  | /'flu:wə/ | /'tri:wə/ | /'mu:kə/ | /'ni:θə/ |
| fléjot     | trossot  | médet   | nouquet | fluwa     | tretha    | meeda    | notha    |
| /fleʒo/    | /tʁoso/  | /medɛ/  | /nuke/  | /'flʌwə/  | /'treθə/  | /'mi:də/ | /'nɒθə/  |
| flayot     | trisu    | mégu    | niguet  | flutha    | treezza   | mooba    | nawya    |
| /flajo/    | /tʁizy/  | /megy/  | /nigɛ/  | /'flʌθə/  | /'tri:zə/ | /'mu:bə/ | /'nɔ:jə/ |
| fléchu     | triset   | mamot   | néguis  | floooha   | treeca    | mubba    | nooha    |
| /fleʃy/    | /tʁizɛ/  | /mamo/  | /negi/  | /'flu:hə/ | /'tri:kə/ | /'mʌbə/  | /'nu:hə/ |
| flajet     | trassaut | ménet   | namis   | flawpa    | trooma    | monna    | nawga    |
| /flaʒɛ/    | /tʁaso/  | /menɛ/  | /nami/  | /'fɔ:pə/  | /'tru:mə/ | /'mɒnə/  | /'nɔ:gə/ |
| flijou     | traset   | mévaut  | nomis   | fluvva    | trumma    | mayya    | nootcha  |
| /fliʒu/    | /tʁazɛ/  | /mevo/  | /nomi/  | /'flʌvə/  | /'trʌmə/  | /'mæjə/  | /'nu:ʃə/ |
| flanis     | trachot  | mivet   | nanet   | fleeva    | truha     | mooza    | neppa    |
| /flani/    | /tʁafo/  | /mivɛ/  | /nanɛ/  | /'fli:və/ | /'trahə/  | /'mu:zə/ | /'nepə/  |
| flénot     | trallet  | massot  | ninut   | flesha    | trooga    | mawya    | ninna    |
| /fleno/    | /tʁalɛ/  | /maso/  | /niny/  | /'fleʃə/  | /'tru:gə/ | /'mɔ:jə/ | /'ninə/  |
| flafet     | trajou   | méchu   | nonet   | flevva    | troosha   | modga    | nawha    |
| /flafɛ/    | /tʁaʒu/  | /mɛʃy/  | /nɔnɛ/  | /'flevə/  | /'tru:ʃə/ | /'mɒdʒə/ | /'nɔ:wə/ |
| fléfis     | trarot   | majet   | névot   | floosha   | trubba    | metcha   | nadga    |
| /flefi/    | /tʁavɔ/  | /maʒɛ/  | /nevo/  | /'flu:ʃə/ | /'trʌbə/  | /'metʃə/ | /'nædʒə/ |
| flivet     | trépet   | méjot   | nivet   | flawva    | tresha    | mitcha   | neyya    |
| /flivɛ/    | /tʁɛpɛ/  | /meʒo/  | /nivɛ/  | /'fɔ:və/  | /'treʃə/  | /'mitʃə/ | /'neja/  |
| flévis     | trécot   | nessat  | novet   | flussa    | trawha    | meepa    | nitha    |
| /flevi/    | /tʁɛko/  | /nesa/  | /nɔvɛ/  | /'flʌsə/  | /'trɔ:hə/ | /'mi:pə/ | /'ni:θə/ |
| Macedonian |          |         |         | Spanish   |           |          |          |
| fl         | tr       | m/n     |         | fl        | tr        | m/n      |          |
| флере      | траба    | миза    | наги    | flase     | treba     | maba     | noga     |
| /flere/    | /traba/  | /miza/  | /nagi/  | /'flase/  | /'treβa/  | /'maβa/  | /'noɣa/  |
| флика      | трабо    | мипо    | ноба    | flego     | trojo     | mado     | nide     |
| /flika/    | /trabo/  | /mipo/  | /noba/  | /'fleyo/  | /'troxo/  | /'maðo/  | /'niðe/  |
| флежо      | траде    | мифе    | ноцу    | flese     | truza     | migo     | nune     |
| /fleʒo/    | /trade/  | /mife/  | /nodʒu/ | /'flese/  | /'truθa/  | /'miɣo/  | /'nune/  |
| флагу      | траже    | мича    | нопу    | flubo     | tredo     | muse     | nibo     |
| /flagu/    | /traze/  | /mitʃa/ | /nopu/  | /'fluβo/  | /'treðo/  | /'muse/  | /'niβo/  |
| флива      | трака    | миту    | ноха    | fliye     | trame     | mape     | nojo     |
| /fliʋa/    | /traca/  | /mitu/  | /noxa/  | /'flije/  | /'trame/  | /'mape/  | /'noxo/  |
| флаба      | траље    | михе    | нола    | floye     | trupo     | mino     | nepe     |
| /flaba/    | /traɫe/  | /mixe/  | /nola/  | /'floje/  | /'trupo/  | /'mino/  | /'nepe/  |
| флема      | трана    | миму    | наса    | flebo     | tride     | moga     | nuda     |

|          |          |         |         |          |          |         |         |
|----------|----------|---------|---------|----------|----------|---------|---------|
| /flema/  | /trana/  | /mimu/  | /nadza/ | /'fleβo/ | /'triðe/ | /'moja/ | /'nuða/ |
| флија    | трања    | миме    | наже    | floza    | triga    | muno    | neja    |
| /flija/  | /traja/  | /mime/  | /naže/  | /'floθa/ | /'triya/ | /'muno/ | /'nexa/ |
| флихо    | трафу    | мине    | наму    | flobo    | troda    | muca    | noya    |
| /flixo/  | /trafu/  | /mine/  | /namu/  | /'floβo/ | /'troða/ | /'muka/ | /'noja/ |
| флира    | траха    | мире    | ноде    | flaba    | trugo    | moye    | nevo    |
| /flira/  | /траха/  | /mire/  | /node/  | /'flaβa/ | /'truyo/ | /'moje/ | /'neβo/ |
| флецо    | трахе    | миси    | нако    | flasa    | truga    | mique   | nera    |
| /fledzo/ | /трахе/  | /midzi/ | /naco/  | /'flasa/ | /'truya/ | /'mike/ | /'nera/ |
| флесо    | трацо    | миљо    | нафо    | flogue   | treza    | mume    | nuso    |
| /fleso/  | /tradzo/ | /miło/  | /nafo/  | /'floye/ | /'treθa/ | /'mume/ | /'nuso/ |
| флаца    | требу    | мору    | нела    | fluco    | trumo    | medo    | nece    |
| /flatsa/ | /trebu/  | /moru/  | /nela/  | /'fluko/ | /'trumo/ | /'meðo/ | /'neθe/ |
| флаче    | треве    | мофа    | нума    | fliyo    | troque   | miyo    | nesa    |
| /flatfe/ | /treve/  | /mofa/  | /numa/  | /'flijo/ | /'troye/ | /'mijo/ | /'nesa/ |
| флазо    | трево    | мота    | неза    | flada    | tribo    | mabe    | niye    |
| /flazo/  | /trevo/  | /mota/  | /neza/  | /'flaða/ | /'tribo/ | /'maβe/ | /'nije/ |
| флате    | трега    | моба    | незо    | fleba    | trica    | moba    | nijo    |
| /flate/  | /trega/  | /moba/  | /nezo/  | /'fleβa/ | /'trika/ | /'moβa/ | /'nixo/ |
| флена    | трего    | мова    | наба    | flabo    | tromo    | mumo    | negue   |
| /flena/  | /trego/  | /mova/  | /naba/  | /'flaβo/ | /'tromo/ | /'mumo/ | /'neye/ |
| флибо    | треда    | миво    | нахе    | flibe    | trube    | meco    | nape    |
| /flibo/  | /treda/  | /mivo/  | /naхе/  | /'fliβe/ | /'truβe/ | /'meko/ | /'nape/ |
| флацо    | тредо    | мока    | нуза    | floyo    | treye    | moyo    | naba    |
| /fladzo/ | /tredo/  | /mosa/  | /nuza/  | /'flojo/ | /'treje/ | /'mojo/ | /'naβa/ |
| флену    | трежа    | мифе    | наље    | flupo    | trana    | miba    | neda    |
| /flenu/  | /treza/  | /miје/  | /naље/  | /'flupo/ | /'trana/ | /'miβa/ | /'neða/ |
| фласе    | треза    | мафо    | нуљо    | flapo    | truma    | muna    | nima    |
| /flase/  | /treza/  | /mafo/  | /nuło/  | /'flapo/ | /'truma/ | /'muna/ | /'nima/ |
| фледо    | треса    | миго    | нацо    | flima    | troda    | mibe    | noña    |
| /fledo/  | /tredza/ | /migo/  | /nadzo/ | /'flima/ | /'troðo/ | /'miβe/ | /'noja/ |
| флепа    | треља    | мифа    | нафа    | fluce    | trume    | meña    | nozo    |
| /flera/  | /treła/  | /miја/  | /naја/  | /'fluθe/ | /'trume/ | /'meja/ | /'noθo/ |
| флега    | треса    | маге    | нижу    | flico    | trome    | mezo    | nipa    |
| /flega/  | /tresa/  | /mage/  | /nižu/  | /'fliko/ | /'trome/ | /'meθo/ | /'nipa/ |
| флеза    | трефе    | мижу    | нала    | flise    | triye    | mase    | nago    |
| /fleza/  | /trefe/  | /mižu/  | /nala/  | /'flise/ | /'triye/ | /'mase/ | /'nayo/ |
| флењо    | трешо    | миде    | нару    | flesa    | trope    | mobe    | nayo    |
| /flejo/  | /trefo/  | /mide/  | /naru/  | /'flesa/ | /'trope/ | /'moβe/ | /'najo/ |
| флузо    | триба    | мања    | ниљо    | flago    | treda    | mipo    | neso    |

|          |          |         |         |          |          |         |         |
|----------|----------|---------|---------|----------|----------|---------|---------|
| /fluzo/  | /triba/  | /mapa/  | /niŋo/  | /'flayo/ | /'tređa/ | /'mipo/ | /'neso/ |
| фледа    | трива    | мапу    | нину    | floda    | trico    | mapo    | noza    |
| /fleda/  | /triva/  | /maru/  | /ninu/  | /'flođa/ | /'triko/ | /'mapo/ | /'noða/ |
| флеча    | трига    | маха    | нипо    | fleme    | trema    | meگو    | naja    |
| /fletja/ | /triga/  | /maxa/  | /nipo/  | /'fleme/ | /'trema/ | /'meyo/ | /'naxa/ |
| флоса    | триџе    | masa    | нимо    | flupe    | trige    | mese    | nega    |
| /flosa/  | /triје/  | /madza/ | /nimo/  | /'flupe/ | /'trixe/ | /'mese/ | /'neya/ |
| флочи    | трида    | мафе    | ниња    | fleno    | trego    | mizo    | neyo    |
| /flotji/ | /trida/  | /mafe/  | /niņa/  | /'fleno/ | /'treyo/ | /'miθo/ | /'nejo/ |
| флица    | тридо    | маба    | нире    | flazo    | troja    | muje    | nuzo    |
| /flitsa/ | /trido/  | /maba/  | /nire/  | /'flaθo/ | /'troxa/ | /'muxe/ | /'nuθo/ |
| флање    | триже    | моџа    | ника    | flopa    | trobe    | mebe    | nida    |
| /flape/  | /triје/  | /modza/ | /nika/  | /'flopa/ | /'troβε/ | /'meβε/ | /'niða/ |
| флуфе    | трижу    | мога    | нита    | flame    | trugue   | maso    | nobe    |
| /flupe/  | /triжу/  | /moga/  | /nita/  | /'flame/ | /'truye/ | /'maso/ | /'noβε/ |
| флата    | триза    | моџа    | нихе    | fleyo    | trene    | mobo    | nujo    |
| /flata/  | /triza/  | /moja/  | /nixе/  | /'flejo/ | /'trene/ | /'moθo/ | /'nuxo/ |
| флаки    | тризи    | мони    | неса    | floba    | treyo    | mejo    | napa    |
| /flaci/  | /trizi/  | /moni/  | /nedza/ | /'floβa/ | /'trejo/ | /'mexo/ | /'napa/ |
| флиње    | трисе    | моше    | нишу    | fluma    | trija    | miñe    | najo    |
| /flipe/  | /tridze/ | /moje/  | /nifu/  | /'fluma/ | /'trixa/ | /'miñe/ | /'naxo/ |
| флеро    | трила    | маџа    | ниге    | fluzo    | trusa    | muzo    | nuyo    |
| /flero/  | /trila/  | /maja/  | /nige/  | /'fluθo/ | /'trusa/ | /'muθo/ | /'nujo/ |
| флоња    | триле    | маџа    | нила    | flope    | troco    | meпо    | nija    |
| /flopа/  | /trile/  | /madza/ | /nila/  | /'flope/ | /'troko/ | /'meпо/ | /'nixa/ |
| флеша    | трило    | моџе    | нифо    | flija    | trigue   | muba    | neña    |
| /fleja/  | /trilo/  | /mofe/  | /nifo/  | /'flixa/ | /'triye/ | /'muβa/ | /'neпа/ |
| флова    | триме    | моџо    | нисе    | flopo    | truye    | muco    | noque   |
| /flover  | /trime/  | /modzo/ | /nise/  | /'flopo/ | /'truje/ | /'muko/ | /'noke/ |
| флако    | трина    | можа    | нево    | fludo    | treda    | mope    | nuñe    |
| /flako/  | /trina/  | /moza/  | /nevo/  | /'fluđo/ | /'tređa/ | /'mope/ | /'nuñe/ |
| флато    | трине    | моха    | нисе    | flega    | trima    | miña    | nede    |
| /flato/  | /trine/  | /moxa/  | /nidze/ | /'fleya/ | /'trima/ | /'miņa/ | /'neđe/ |
| флуга    | трипу    | моса    | неду    | fleje    | trode    | muce    | nisa    |
| /fluga/  | /tripu/  | /modza/ | /nedu/  | /'flexe/ | /'trođe/ | /'muθe/ | /'nisa/ |
| флама    | триса    | моку    | неде    | flaga    | treso    | meda    | nude    |
| /flama/  | /trisa/  | /moku/  | /nede/  | /'flaya/ | /'treso/ | /'međa/ | /'nuđe/ |
| флапо    | трита    | моле    | неџа    | flune    | trida    | mije    | nigo    |
| /flapo/  | /trita/  | /mole/  | /neja/  | /'flune/ | /'triđa/ | /'mixe/ | /'niyo/ |
| флаше    | триту    | моља    | неџо    | flede    | troga    | meba    | neme    |

|          |          |         |         |          |          |         |         |
|----------|----------|---------|---------|----------|----------|---------|---------|
| /flaʃe/  | /tritu/  | /moʃa/  | /nedʒo/ | /'fleðe/ | /'troja/ | /'meʃa/ | /'neme/ |
| флета    | триче    | моџа    | нева    | flume    | tripo    | mada    | naca    |
| /fleta/  | /tritʃe/ | /moʒa/  | /neva/  | /'flume/ | /'tripo/ | /'maða/ | /'naka/ |
| фладо    | тричи    | мому    | нежа    | flugo    | tremo    | mepa    | niva    |
| /flado/  | /tritʃi/ | /momu/  | /neʒa/  | /'fluɣo/ | /'tremo/ | /'mepa/ | /'niβa/ |
| флимо    | триша    | мосо    | небу    | flaya    | triya    | muja    | nopa    |
| /flimo/  | /trifja/ | /moso/  | /nebu/  | /'flaja/ | /'trija/ | /'muxa/ | /'nopa/ |
| фларо    | трише    | мопа    | незе    | fleda    | treya    | mosa    | neza    |
| /flaro/  | /trife/  | /mopa/  | /neze/  | /'fleða/ | /'treja/ | /'mosa/ | /'neθa/ |
| фладе    | тробо    | миџо    | ноња    | flumo    | truna    | meque   | nosa    |
| /flade/  | /trobo/  | /midʒo/ | /noja/  | /'flumo/ | /'truna/ | /'meke/ | /'nosa/ |
| флаза    | трове    | мебо    | ноља    | fligo    | troyo    | mupa    | niyo    |
| /flaza/  | /trove/  | /mebo/  | /noʃa/  | /'fliɣo/ | /'trojo/ | /'mupa/ | /'niʒo/ |
| флито    | трога    | моња    | ниду    | flimo    | triyo    | mose    | nazo    |
| /flito/  | /troga/  | /mopa/  | /nidu/  | /'flimo/ | /'trijo/ | /'mose/ | /'naθo/ |
| флахи    | троге    | мубе    | нига    | flape    | trevo    | mogue   | naco    |
| /flaxi/  | /troge/  | /mube/  | /niga/  | /'flape/ | /'treβo/ | /'moɣe/ | /'nako/ |
| флачо    | трого    | мела    | ниву    | fleza    | trice    | muño    | noce    |
| /flatʃo/ | /trogo/  | /mela/  | /nivu/  | /'fleθa/ | /'triθe/ | /'mupo/ | /'noθe/ |
| флаже    | трожа    | меду    | нопа    | flosa    | truba    | mice    | namo    |
| /flaze/  | /troza/  | /medu/  | /nopa/  | /'flosa/ | /'truβa/ | /'miθe/ | /'namo/ |
| флеву    | троке    | муца    | нубо    | flice    | trayo    | migue   | nigue   |
| /flevu/  | /troce/  | /mudʒa/ | /nubo/  | /'fliθe/ | /'trajo/ | /'miɣe/ | /'niɣe/ |
| флаја    | троку    | меве    | нока    | flose    | tribe    | mupo    | nase    |
| /flaja/  | /troku/  | /meve/  | /noka/  | /'flose/ | /'triβe/ | /'mupo/ | /'nase/ |
| флаџа    | троле    | мего    | ноку    | flobe    | traja    | moze    | nuce    |
| /flaja/  | /trole/  | /mego/  | /noku/  | /'floβe/ | /'traxa/ | /'moθe/ | /'nuθe/ |
| флаке    | троно    | меса    | ноша    | flabe    | trisa    | muga    | naque   |
| /flace/  | /trono/  | /medza/ | /noʃa/  | /'flaβe/ | /'trisa/ | /'muya/ | /'nake/ |
| флего    | троња    | муло    | нуба    | flayo    | truzo    | mugo    | nera    |
| /flego/  | /troja/  | /mulo/  | /nuba/  | /'flajo/ | /'truθo/ | /'muɣo/ | /'nera/ |
| флаха    | троњо    | месо    | ноча    | flimo    | trosa    | miza    | naya    |
| /flaxa/  | /trojo/  | /medzo/ | /notʃa/ | /'flimo/ | /'trosa/ | /'miθa/ | /'naja/ |
| флаго    | тросо    | мишо    | нора    | flogo    | traco    | maye    | nubo    |
| /flago/  | /troso/  | /miʃo/  | /nora/  | /'floɣo/ | /'trako/ | /'maje/ | /'nuβo/ |
| флаца    | троту    | меке    | нибо    | fludo    | trasa    | maje    | none    |
| /fladʒa/ | /trotu/  | /mece/  | /nibo/  | /'fluðo/ | /'trasa/ | /'maxe/ | /'none/ |
| флеба    | трофа    | муве    | нида    | fluse    | triba    | muya    | nema    |
| /fleba/  | /trofa/  | /muve/  | /nida/  | /'fluse/ | /'triβa/ | /'muja/ | /'nema/ |
| фласа    | трофе    | межа    | ноту    | floma    | trada    | mija    | nipe    |



|          |          |         |         |          |          |         |         |
|----------|----------|---------|---------|----------|----------|---------|---------|
| /fladza/ | /trofe/  | /меза/  | /notu/  | /'floma/ | /'traða/ | /'mixa/ | /'nipe/ |
| флака    | троџа    | меза    | ноку    | fledo    | trime    | mace    | nugo    |
| /flaka/  | /trodza/ | /meza/  | /nocu/  | /'fleðo/ | /'trime/ | /'maθe/ | /'nuɣo/ |
| фледу    | трубо    | муља    | нуго    | flano    | treca    | mone    | noso    |
| /fledu/  | /trubo/  | /muła/  | /nugo/  | /'flano/ | /'treka/ | /'mone/ | /'noso/ |
| флеѓе    | трува    | муњо    | нуџа    | flomo    | trede    | meño    | nuga    |
| /fleje/  | /truva/  | /muɾo/  | /nudza/ | /'flomo/ | /'treðe/ | /'meɲo/ | /'nuɣa/ |
| флења    | труга    | муко    | нува    | fliso    | tresa    | miso    | nage    |
| /fleɲa/  | /truga/  | /mucɔ/  | /nuva/  | /'fliso/ | /'tresa/ | /'miso/ | /'naxe/ |
| флемо    | труѓа    | муљо    | нуњо    | floga    | treje    | megue   | nuye    |
| /flemo/  | /truɟa/  | /muło/  | /nuɾo/  | /'floya/ | /'trexe/ | /'meye/ | /'nuje/ |
| флеѓа    | труго    | муко    | нулу    | flono    | trane    | miye    | nome    |
| /fleɟa/  | /trugo/  | /muko/  | /nulu/  | /'flono/ | /'trane/ | /'mije/ | /'nome/ |
| флети    | труда    | муфе    | нуфо    | flezo    | trude    | mopo    | nise    |
| /fleti/  | /truda/  | /mufe/  | /nufo/  | /'fleθo/ | /'truðe/ | /'mopo/ | /'nise/ |
| флено    | труде    | муфо    | нука    | fluca    | trade    | made    | nuco    |
| /flenɔ/  | /trude/  | /mufo/  | /nuka/  | /'fluka/ | /'traðe/ | /'maðe/ | /'nuko/ |
| флума    | труже    | маду    | низу    | fluya    | truce    | meso    | noca    |
| /fluma/  | /truze/  | /madu/  | /nizu/  | /'fluja/ | /'truθe/ | /'meso/ | /'noka/ |
| флењу    | труза    | мудо    | нуро    | flude    | trido    | mupe    | nego    |
| /fleɲu/  | /truza/  | /mudo/  | /nuro/  | /'fluðe/ | /'triðo/ | /'mupe/ | /'neɣo/ |
| флеџа    | тpysa    | муше    | нусе    | flupa    | trapa    | mene    | neca    |
| /fledza/ | /trudza/ | /muše/  | /nuse/  | /'flupa/ | /'trapa/ | /'mene/ | /'neka/ |
| флето    | трука    | мусе    | нуде    | flona    | troya    | muque   | nizo    |
| /fletɔ/  | /truca/  | /muse/  | /nude/  | /'flona/ | /'troja/ | /'muke/ | /'niθo/ |
| флуба    | трука    | мука    | нута    | flane    | troce    | mede    | noda    |
| /fluba/  | /truca/  | /muca/  | /nuta/  | /'flane/ | /'troθe/ | /'meðe/ | /'noða/ |
| флуво    | трума    | муфа    | нуѓа    | fliza    | trise    | mube    | noyo    |
| /fluvo/  | /truma/  | /mufa/  | /nuɟa/  | /'fliθa/ | /'trise/ | /'muβe/ | /'nojo/ |
| флуѓа    | труња    | муче    | нуша    | fluje    | treco    | mubo    | nuja    |
| /fluɟa/  | /truɲa/  | /mutʃe/ | /nuʃa/  | /'fluxe/ | /'treko/ | /'muβo/ | /'nuxa/ |
| фливо    | труње    | мању    | ниго    | floca    | treme    | meno    | niga    |
| /flivo/  | /truɲe/  | /maɲu/  | /nigo/  | /'floka/ | /'treme/ | /'meno/ | /'niɣa/ |
| флеже    | тpусо    | мухе    | нуже    | flode    | trabe    | meya    | nuza    |
| /fleze/  | /truso/  | /muxe/  | /nuze/  | /'floðe/ | /'traβe/ | /'meja/ | /'nuθa/ |
| флута    | трута    | муга    | нуто    | flida    | truja    | muso    | nepa    |
| /fluta/  | /truta/  | /muga/  | /nuto/  | /'fliða/ | /'truxa/ | /'muso/ | /'nepa/ |
| флуго    | труфо    | мупе    | нумо    | fleso    | traco    | meyo    | nine    |
| /flugɔ/  | /trufo/  | /mupe/  | /numo/  | /'fleso/ | /'trako/ | /'mejo/ | /'nine/ |
| флугу    | труха    | мура    | нуве    | fliba    | truso    | muñe    | noje    |

|          |           |         |         |          |          |          |          |
|----------|-----------|---------|---------|----------|----------|----------|----------|
| /flugu/  | /truxa/   | /mura/  | /nuve/  | /'fiβa/  | /'truso/ | /'mupe/  | /'noxex/ |
| флуда    | труце     | муча    | нуко    | fluxa    | trado    | mapex    | naga     |
| /fluda/  | /trudʒex/ | /mutʃa/ | /nuxo/  | /'fluθa/ | /'traðo/ | /'mapex/ | /'naɣa/  |
| флешо    | труцо     | муса    | нуха    | flado    | trezo    | mino     | neya     |
| /fleʃo/  | /trudʒo/  | /mudʒa/ | /nuxa/  | /'flaðo/ | /'treθo/ | /'mino/  | /'neja/  |
| флиже    | труша     | мисо    | нофе    | fluso    | traye    | nupo     | nice     |
| /fliʒex/ | /truʃa/   | /miso/  | /nofex/ | /'fluso/ | /'traje/ | /'nupo/  | /'niθex/ |

## Appendix II. Definitions

### /fl/

#### Definition 1

The rise and fall of mercury in a thermometer  
Hausse ou baisse du mercure dans un thermomètre  
Subida o bajada del mercurio al cambiar la temperatura en un termómetro  
качувањето и спуштањето на живата во термометар

#### Definition 2

Movement of a liquid inside a phial  
Mouvement d'un liquide dans une ampoule  
Movimiento del líquido dentro de una ampolla al moverla  
движењето на течност во шишенце

#### Definition 3

Dripping of frothy beer down the side of a glass  
Glissement de la mousse de la bière sur le bord externe du verre  
Deslizamiento de la espuma al salirse por la pared del vaso  
излевањето на пената од пивото надолу по сидовите на чашата

#### Definition 4

Small leak in wine barrels  
Petite fuite par laquelle s'échappe le vin dans les tonneaux/fûts  
Pequeña pérdida que tienen los toneles por donde escapa el vino  
мало протекување од напукнатини на бурињата за вино

#### Definition 5

Slow motion of water in a small ornamental waterfall  
Mouvement lent de l'eau qui coule dans une cascade ornementale de petite taille  
Movimiento lento del agua en una fuente ornamental  
бавно движење на водата во мал украсен водопад

#### Definition 6

Chin dribble of one-month-old babies as it goes down their chin  
Salive des bébés de moins d'un mois qui coule le long de leur menton  
Saliva de los bebés de menos de un mes al resbalar por la barbilla  
течење лиги по брадата на едномесечни бебиња

#### Definition 7

Flood irrigation of crops near rivers  
L'irrigation par inondation des cultures près des rivières  
Riego por inundación de los cultivos cercanos a los ríos  
систем за поплавно наводнување на житни култури покрај реки

#### Definition 8

Portion of liquid that spills over when grapes are trodden on to make wine  
Quantité de liquide qui sort du raisin quand on l'écrase pour faire du vin  
Porción de líquido que rebosa al pisar la uva para hacer vino  
течноста што се испедува кога грозјето се гмечи за да се направи вино

#### Definition 9

Horizontal sliding of rain drops on the window of a moving car  
Déplacement horizontal des gouttes de pluie sur la vitre d'une voiture en marche  
Desplazamiento de las gotas de lluvia de manera horizontal en la ventana de un coche en marcha  
хоризонталното движење на капките

#### Definition 10

Rise and fall of milk and other drinks when boiling  
Montée du lait ou d'autres sortes de liquides quand ils bouent  
Subida de la leche y otros líquidos al hervir  
дигањето и спуштањето на млеко и/или на други пијалоци при вриење

#### Definition 11

Running of tears down somebody's cheeks  
Coulée des larmes le long des joues de quelqu'un  
Caída/recorrido de las lágrimas por la mejilla de alguien  
течење солзи на нечиј образ

#### Definition 12

Slow drifting of clouds as they cross the sky  
Mouvement lent des nuages quand ils traversent le ciel  
Movimiento lento de las nubes al cruzar el cielo  
бавно лебдење на облаците по небот

#### Definition 13

Swaying motion of boats docked in a harbour  
Tangage de bateaux amarrés dans un port  
Vaivén de los barcos amarrados en un puerto  
нишање на чамците прикачени на пристаништето

#### Definition 14

Movement of coffee beans when stirred in a recipient  
Mouvement des grains de café remués dans un récipient  
Movimiento de los granos de café al removerlos un recipiente  
движењето на зрната кафе кога се мелат во мел

#### Definition 15

Movement of soap bubbles in the air  
Mouvement des bulles de savon dans l'air  
Movimiento de las pompas de jabón en el aire  
движењето на балончињата од сапуница во воздуху

#### Definition 16

Movement of a ship's loosened sails when the wind blows on them  
Mouvement lent que font les voiles des bateaux battues par le vent  
Movimiento lento de las velas de los barcos al darles el viento  
движењето на незатегнатите едра на бродот кога

#### Definition 17

Movement of a candle's light by the wind  
Mouvement de la flamme d'une bougie à cause d'un courant d'air  
Movimiento de la llama de una vela movida por el viento  
движењето на пламенчето на свеката од ветрот

#### Definition 18

Movement of tree branches blown by the wind  
Mouvement des branches à cause du vent

Movimiento de las ramas por el viento  
движење на гранките на дрвјата разнишани од ве

#### Definition 19

Change in the path of a paper plane caused by air currents  
Modification de la trajectoire d'un avion en papier à cause du vent  
Alteración de la trayectoria de un avión de papel por la corriente de viento  
промена на правецот на движење на авиончето од хартија предизвикана од  
воздушните струи

#### Definition 20

Movement of food as it goes through cows' or other ruminants' four stomachs  
Mouvement des aliments quand ils se déplacent au travers des quatre estomacs des vaches  
ou d'autres ruminants  
Movimiento de los alimentos al trasladarse entre los cuatro estómagos de las vacas u otros  
rumiantes  
движење на храната во желудникот на кравите или на другите преживари

#### Definition 21

Fandom movement of a leaf carried away by the wind  
Mouvement aléatoire d'une feuille portée par le vent  
Recorrido caprichoso de una hoja llevada por el viento  
случајно движење на лист одвеан од ветрот

#### Definition 22

Low density breast implant  
имплант на дојка со мала густина  
Implant mammaire en silicone de faible densité  
Implante mamario de silicona de poca densidad

#### Definition 23

Freshly cut bacon or ham fat  
Graisse gélatineuse du jambon ou du lard fraîchement coupée  
Grasa gelatinosa del jamón o tocino recién cortado  
свежо сечена сланина или шунка

#### Definition 24

Unexercised muscle with little strength  
Muscle affaibli, qui n'a pas de force  
Músculo de poca fuerza, no ejercitado  
ненавежбан мускул со мала сила

#### Definition 25

Male bather's beer belly falling over his belt  
Ventre à bière d'un baigneur qui passe au dessus de sa ceinture  
Barriga cervecera de un bañista que cae por encima del cinturón  
машки пивски стомак надвиснат над појасот

#### Definition 26

Cellulite buttocks that are untoned  
Fesse pleine de cellulite et peu tonifiée  
Nalga celulítica y poco tonificada  
целулитни наслаги на опуштен задник

#### Definition 27

Low-tension spring offering little resistance  
Ressort mou/malléable, qui offre peu de résistance  
Muelle de poca tensión que ofrece poca resistencia  
слабооптегливи федери со мал отпор

#### Definition 28

Squishy and elastic chinese bazaar toy that's easily breakable  
Jouet d'un bazar chinois mou et élastique facilement cassable  
Juguete de bazar chino blando y elástico fácilmente rompible  
меки и еластични кинески играчки што лесно се кршат

#### Definition 29

Soft and large wrinkles on the skin of a dog (e.g. shar pei)  
Grands plis mous de la peau d'un chien (ex: Shar pei)  
Arrugas blandas y grandes de la piel de un perro (p. ej. Shar pei)  
меки и големи брчки на кожата на кучето (на пр. шар пеи)

#### Definition 30

Trampoline found at a fair  
Trampoline de foire  
Cama elástica de las ferias  
трамбулина на панаѓур

/tr/

#### Definition 31

Sound made by two marbles crashing into each other  
Son produit par la collision de deux billes  
Sonido producido al chocar dos canicas  
звук создаден при судир на две џамлии една со друга

#### Definition 32

Sound made by a tram's wheels when going over a level crossing  
Son produit par les roues d'une locomotive au moment de passer par un passage à niveau  
Sonido producido por las ruedas de una locomotora al pasar un cruce  
звук создаден од тркала на трамвај при движење преку железнички премин

#### Definition 33

Snapping sound of a big metal door when closing  
Claquement d'une porte en fer qui se referme  
Chasquido de una puerta de rejas al cerrarse  
звукот на тресок што се создава при затворање на голема метална врата

#### Definition 34

Sound made by hail when hitting the ground  
Son produit par la grêle qui heurte le sol  
Sonido producido por el granizo al chocar con el suelo  
звукот што се создава кога удира град по земјата

#### Definition 35

Sound made by a sword when hitting a shield  
Son d'une épée qui percute un bouclier  
Sonido de una espada al golpear un escudo  
звукот што се создава кога меч удира во штит

#### Definition 36

Sound of dynamite exploding underground to make a tunnel  
Son de la dynamite utilisée sous terre pour creuser des tunnels  
Sonido de la dinamita subterránea al detonarla para hacer túneles  
звук на динамит кој експлодира под земјата за да се направи тунел

#### Definition 37

Sound of a canon firing in the distance  
Son d'un coup de canon au loin  
Sonido de un cañonazo en la distancia  
звукот на пукање топ од далечина

#### Definition 38

Sound of a buffalo herd galloping  
Son d'une horde de buffles au galop  
Sonido de una manada de búfalos al galope  
звукот на галопирање на биволско стадо

#### Definition 39

Sound produced by the impact of a wave against the breakwater of a sea promenade  
Son produit par l'impact d'une vague en contact avec la digue d'un port  
Sonido producido por el impacto de una ola con el muro de contención de un paseo marítimo  
звукот што се создава при удар на бран врз заштитниот сид на крајбрежно морско шеталиште

#### Definition 40

Sound of a hoe when hitting a stone in the ground while ploughing  
Son d'une binette qui heurte une pierre quand on laboure  
Sonido de la azada al chocar con una piedra al arar un campo  
звукот што го создава мотиката кога ќе удри во камен во земјата при орање

#### Definition 41

Defensive kick of goats  
Ruade défensive des chèvres  
Coz defensiva de las cabras  
дефанзивен удар на кози

#### Definition 42

Crashing of deer's horns during a fight  
Collision des bois de deux cerfs pendant un duel  
Choque de las cornamentas de los ciervos durante un duelo  
удирањето на роговите на елените за време на борба

#### Definition 43

Hard tapping on the keys of a telephone  
Impact sur les touches d'un téléphone quand on tape dessus avec une force excessive  
Impacto sobre las teclas del teléfono al marcar con excesiva fuerza  
силно притискање на копчињата на телефонот

#### Definition 44

Crashing of two trams into each other



Collision de deux funiculaires  
Colisión de dos teleféricos  
судир на два трамваи еден со друг

#### Definition 45

Intentional impact of a ball on the face of a rival in volleyball  
Coup reçu au visage par un adversaire au volley à cause d'un lancer de balle intentionnel  
Balonazo intencional en la cara del oponente en el volleyball  
намерен удар на топката кон лицето на ривалот во одбојка

#### Definition 46

Strike made during the traditional practice of whacking snakes with bats  
Coups de bâton utilisés dans la pratique ancienne d'extermination de couleuvres  
Golpe producido en la antigua práctica de exterminación de culebras a palos  
звукот на удар направен за време на традиционалниот ритуал на мавање змии со  
лилјаци

#### Definition 47

Tap on a friend's back with excessive force  
Tape de force excessive dans le dos d'un ami  
Palmada en la espalda de un amigo con excesiva fuerza  
тапкање по грбот на пријателот со прекумерна сила

#### Definition 48

Strong blow that breaks a piñata  
Coup qui parvient à casser une piñata  
Golpe que logra romper una piñata  
силен удар кој раскинува пињата

#### Definition 49

Cracking of walnuts, almonds and other nuts using a flat stone  
Cassage de noix, amandes et fruits secs en utilisant une pierre plate  
Cascado de nueces, almendras y frutos utilizando una piedra plana  
кршење ореви, бадеми и други јаткасти плодови со користење на рамен камен

#### Definition 50

Head bump of two football players trying to hit the ball  
Impact des têtes de deux footballeurs au moment où ils essaient de tirer  
Impacto de las cabezas de los futbolistas al intentar rematar  
судир на глава со глава на двајца фудбалери при обид да ја удрат топката

#### Definition 51

Destruction of official files with a paper shredder  
Élimination totale de documents officiels avec une déchiqueteuse  
Liquidación de documentación oficial con una máquina  
уништување на официјални документи со режач на хартија

#### Definition 52

Breaking of glass due to the vibrations of a high-pitched sound  
Cassure d'un verre dû à un son fortement aigu  
Rotura del cristal debido a un sonido muy agudo  
кршење на стаклото предизвикано од вибрациите на високотонски звук

#### Definition 53

Accidental breaking of goods in a shop as somebody goes down an aisle  
Cassure accidentelle d'articles dans une boutique de souvenirs quand quelqu'un passe dans une des allées  
Rotura accidental de artículos de bazar al golpearlos al pasar por un pasillo  
случајно кршење на артикли во продавница додека некој минува по коридорот

#### Definition 54

Breaking of the keys of a mobile phone after tapping them with great force  
Cassure des touches d'un portable après avoir tapé trop fort dessus  
Rotura de las teclas de un móvil por teclear con excesiva fuerza  
кршење на копчињата на мобилен телефон поради притискање со голема сила

#### Definition 55

Breaking of glasses while playing sport  
Cassure des verres d'une paire de lunettes pendant la pratique d'un sport  
Rotura del cristal de unas gafas en la práctica del deporte  
кршење на очила додека некој игра спорт

#### Definition 56

Intentional dropping of a disliked vase or similar object  
Cassure d'un vase ou d'un objet similaire que l'on n'aime pas après l'avoir fait tombé intentionnellement  
Rotura de un jarrón u objeto similar que no te gusta al dejarlo caer  
намерно испуштање на некоја непосакувана вазна или сличен објект

#### Definition 57

Tree-top fruit gathering by hitting with a long stick in a violent way

Récolte des fruits des branches en les frappant violemment avec un bâton  
Recogida de la fruta de las ramas golpeándola violentamente con una vara  
берење овошје од дрво со грубо удирање со долг стап

#### Definition 58

Crushing of the pulp of a fruit to make jam  
Ecrasement de la pulpe des fruits pour en faire de la confiture  
Machacado de la pulpa de la fruta para hacer mermelada  
ситнење на пулпата на овошјето за правање џем

#### Definition 59

Breaking of a leg bone after falling from some height  
Fracture d'un os de la jambe à cause d'une chute d'une certaine hauteur  
Ruptura del hueso de una pierna por caída desde una altura  
кршење на коска на нозете по паѓање од некоја висина

#### Definition 60

Knocking down of a castle gate with a battering ram  
Démolition de la porte d'un château avec une tête de bélier  
Derribo de la puerta de un castillo con un ariete  
тропање на вратата на замокот со опсаден овен

### **/n/ and /m/**

#### Definition 61

Tingling feeling in the arm when it is going numb  
Sensation de fourmillement dans le bras quand il s'endort  
Sensación de hormigueo en el brazo al dormirse  
чувството на трпнење во раката кога ќе се вкочани

#### Definition 62

Pain in the neck after turning it from side to side too much (e.g. while watching a tennis match)  
Douleur dans le cou après avoir tourné la tête de manière excessive (ex: quand on regarde un match de tennis)  
Dolor en el cuello al girarlo excesivamente (ej. al ver un partido de tenis)  
болка во вратот поради премногу вртење од една страна на друга страна (на пр. додека гледате тениски натпревар)

#### Definition 63

Stiffness in the wrists due to overuse of a computer keyboard  
Rigidité des poignets due à l'utilisation excessive du clavier d'un ordinateur  
Rigidez en las muñecas debida al uso excesivo del teclado del ordenador  
вкочанетост во зглобовите поради прекумерна употреба на компјутерската тастатура

#### Definition 64

Feeling of discomfort after having eaten too much rice  
Sensation de mal-être après avoir mangé trop de riz  
Sensación de malestar tras haber comido arroz en exceso  
чувство на тегоба по прејадување ориз

#### Definition 65

Numbness in the bottom after sitting for a long time  
Engourdissement des fesses après avoir été assis longtemps  
Entumecimiento de las nalgas tras haber estado mucho tiempo sentado  
вкочанетост на задникот по седење долго време

#### Definition 66

Stiffness in the legs after a long journey in a constricted space (e.g. plane, bus, etc.)  
Rigidité dans les jambes après un voyage dans un endroit étroit (ex: avion, bus)  
Rigidez en las piernas tras haber viajado en un espacio restringido (p. ej. avión, autobús, etc.)  
вкочанетост во нозете по долго патување во ограничен простор (на пр. во авион, автобус, итн.)

#### Definition 67

Feeling of dizziness while going down the stairs  
Sensation de mal de mer en descendant les escaliers  
Sensación de mareo al bajar unas escaleras  
чувство на вртоглавица додека слегуваш по скалите

#### Definition 68

Dizziness caused by going on a ride at the fair (e.g. on the roller-coaster)  
Vertige produit après être monté sur une attraction (ex: montagne russe)  
Vértigo producido por haber montado en una atracción de feria (ej. una montaña rusa)  
вртоглавица предизвикана од возење на панаѓур (на пр. на ролеркостер)

#### Definition 69

Itching feeling after being bitten by a mosquito  
Sensation de démangeaison après avoir été piqué par un moustique  
Sensación de escozor tras haber sido picado por un mosquito

чувството на чешање по каснување од комарец

#### Definition 70

Toothache after biting an ice cube  
Douleur dentaire quand on mord dans un glaçon  
Dolor en la dentadura al morder un cubito de hielo  
забоболка предизвикана од гризење коцка мраз

#### Definition 71

Tool for opening oysters  
Ustensile pour ouvrir les huîtres  
Utensilio para abrir las ostras  
отворачи за остриги

#### Definition 72

Tool for checking the voltage of embedded circuits  
Appareil pour vérifier le voltage des circuits intégrés  
Aparato para comprobar el voltaje de los circuitos integrados  
алатка за проверка на напонот во вградените кола

#### Definition 73

Underwater compass showing depth as well as the cardinal points  
Boussole sous-marine qui indique la profondeur ainsi que les points cardinaux  
Brújula submarina que indica tanto la profundidad como los puntos cardinales  
подводен компас кој покажува длабочина, како и основни точки

#### Definition 74

Refrigeration system used in nuclear submarines  
Système de réfrigération utilisé dans les sous-marins nucléaires  
Sistema de refrigeración utilizado en los submarinos nucleares  
систем за ладење што се користи во нуклеарните подморници

#### Definition 75

Digital glasses for night vision  
Lunettes numériques utilisées pour la vision nocturne  
Gafas digitales para la visión nocturna  
дигитални очила за ноќно гледање

#### Definition 76

System for detecting motion on the perimeter of a house

Système de détection de mouvement dans le périmètre d'une maison  
Sistema de detección de movimiento en el perímetro de una casa  
систем за откривање на движење во околината на куќата

Definition 77

Net for catching jellyfish  
Filet pour la capture de méduses  
Red para la captura de medusas  
мрежа за фаќање медузи

Definition 78

Alloy spanner with an automatic pressure system  
Clef anglaise faite d'un alliage et munie d'un système de pression automatique  
Llave inglesa de aleación con sistema de presión automática  
алуминиумски клуч со автоматски систем за притисок

Definition 79

Lever for raising hospital beds  
Manivelle pour réhausser les lits d'hôpitaux  
Manivela para elevar las camas de hospital  
лост за подигање болнички кревети

Definition 80

Automatic mechanism for raising window blinds  
Mécanisme automatique pour lever les volets  
Mecanismo automático para elevar las persianas  
автоматски механизам за подигање ролетни

Definition 81

Typical seaweed dish from Southeast Asia  
Plat typique du sud-est asiatique à base d'algues  
Plato típico de algas del sudeste asiático  
типично јадење од алги од Југоисточна Азија

Definition 82

Stew made with potatoes and vegetables  
Ragoût de viande avec des pommes de terre et des légumes  
Guiso de carne estofada con patatas y verdura  
чорба од компири и зеленчук

Definition 83

Spicy ingredient in mexican cuisine  
Condiment piquant issu de la cuisine mexicaine  
Condimento picante de la cocina mexicana  
зачин од мексиканската кујна

#### Definition 84

Pea salad from the Persian Gulf countries  
Salade de petits pois des pays du Golf Persique  
Ensalada de guisantes de los Países del Golfo Pérsico  
салата од грашок од земјите од Персискиот Залив

#### Definition 85

Afternoon meal made by working peasants  
Plat réalisé au milieu de l'après-midi par les paysans  
Comida realizada a media tarde por los campesinos  
попладневен оброк подготвен од селани аргати

#### Definition 86

Ancient type of beer from scandinavian countries  
Ancien type de bière des pays scandinaves  
Antiguo tipo de cerveza de los países escandinavos  
древен вид на пиво од скандинавските земји

#### Definition 87

Toasted sandwich made in a wood-fired oven  
Sandwich de pain grillé au feu de bois  
Bocadillo de pan tostado al horno de leña  
потпечен сендвич направен во фурни на дрва

#### Definition 88

Small wild game dish (e.g. quail, partridge) found in mountain villages  
Plat de petit gibier (ex: caille, perdrix) dans les villages de montagne  
Plato de caza menor (ej. codorniz, perdiz) en pueblos montañoses  
јадење подготвено од ситен дивеч (на пр. фазан, еребица) во планинските села

#### Definition 89

Typical tapas from ayamonte (near the Portuguese frontier)  
Tapas typiques de Ayamonte à la frontière du Portugal  
Tapa típica de Ayamonte, en la frontera de Portugal  
типични предјадења од Ајамонте (во близина на португалската граница)

## Definition 90

Blueberry liqueur with aniseed

Liqueur de myrtilles avec de l'anis

Licor de arándanos con anís

ликер од боровинки со анасон
